# Supplementary material
Source: PubMed Central journal article supplement (PMC2905825)
Supplement: NIHMS220213-supplement-Supporting_Information.pdf [file NIHMS220213-supplement-Supporting_Information.pdf]

# Antiproliferative Bistramides from *Trididemnum cyclops* from Madagascar

Brian T. Murphy, Shugeng Cao, Peggie Brodie, Jean Maharavo, Hanta Andriamanantoanina, Pierre Ravelonandro, and David G. I. Kingston

## Supporting Information

<sup>1</sup>H NMR Data for Bistramides A and D

<sup>1</sup>H NMR Spectrum of 39-Oxobistramide K (**1**) in CD<sub>3</sub>OD

ROESY Spectrum of 39-Oxobistramide K (**1**) in CD<sub>3</sub>OD

COSY Spectrum of 39-Oxobistramide K (**1**) in CD<sub>3</sub>OD

HSQC Spectrum of 39-Oxobistramide K (**1**) in CD<sub>3</sub>OD

HMBC Spectrum of 39-Oxobistramide K (**1**) in CD<sub>3</sub>OD

<sup>1</sup>H NMR Spectrum of Bistramide A (**2**) in CD<sub>3</sub>OD

<sup>13</sup>C NMR Spectrum of Bistramide A (**2**) in CDCl<sub>3</sub>

COSY Spectrum of Bistramide A (**2**) in CDCl<sub>3</sub>

HMBC Spectrum of Bistramide A (**2**) in CDCl<sub>3</sub>

<sup>1</sup>H NMR Spectrum of Bistramide D (**3**) in CD<sub>3</sub>OD

CD Spectrum of 39-Oxobistramide K (**1**) in CH<sub>3</sub>OH

CD Spectrum of Bistramide A (**2**) in CH<sub>3</sub>OH

Photograph of NB 04-05-31 (*Trididemnum cyclops*)

**<sup>1</sup>H NMR Data for Bistramide A (2):** <sup>1</sup>H NMR (CDCl<sub>3</sub>) δ<sub>H</sub> 0.80 (3H, d, *J* = 6.5 Hz, H-24), 0.86 (3H, d, *J* = 7.0 Hz, H-10), 0.94 (3H, d, *J* = 6.5 Hz, H-35), 1.24 (3H, d, *J* = 6.5 Hz, H-17), 1.25 (3H, d, *J* = 7.5 Hz, H-40), 1.10 – 1.90 (24H, m, H-7, 8, 9, 20, 21, 23, 25, 26, 28, 29, 30, 32, 33), 1.91 (3H, dd, *J* = 1.5, 6.5 Hz, H-1), 2.19 (1H, m, Ha-12), 2.33 (1H, m, H-24), 2.37 (1H, m, H-16), 2.52 (1H, dd, *J* = 3.0, 16.5 Hz, Ha-5), 2.76 (1H, dd, *J* = 11.5, 15.0 Hz, Hb-12), 2.90 (1H, dd, *J* = 9.0, 17.0 Hz, Hb-5), 3.14 (1H, t, *J* = 9.5 Hz, H-22), 3.25 (1H, m, Ha-14), 3.30 (2H, m, H-19), 3.46 (1H, m, H-31), 3.51 (1H, m, Hb-14), 3.71 (1H, m, H-15), 4.06 (1H, dd, *J* = 4.5, 11.0 Hz, H-11), 4.19 (1H, m, H-6), 5.18 (1H, d, *J* = 9.0 Hz, H-36), 6.12 (1H, dd, *J* = 1.5, 16.0 Hz, H-3), (1H, dd, *J* = 6.5, 16.0 Hz, H-2), 6.96 (1H, t, *J* = 5.5 Hz, NH-19), 7.32 (1H, t, *J* = 5.5 Hz, NH-14).

**<sup>1</sup>H NMR Data for Bistramide D (3):** <sup>1</sup>H NMR (CD<sub>3</sub>OD) δ<sub>H</sub> 0.83 (3H, d, *J* = 6.5 Hz, H-24), 0.85 (3H, d, *J* = 7.0 Hz, H-10), 0.95 (3H, d, *J* = 6.5 Hz, H-35), 1.14 (3H, d, *J* = 7.0 Hz, H-17), 1.20 (3H, d, *J* = 6.5 Hz, H-40), 1.25 – 1.95 (22H, m, H-7, 9, 20, 21, 23, 25, 26, 28, 29, 30, 32, 33), 1.35 (2H, m, H-8), 1.38 (2H, m, H-33), 1.43 and 1.65 (2H, m, H-5), 1.61 (3H, s, H-38), 1.67 (d, *J* = 6.5 Hz, H-1), 2.23 (1H, dd, *J* = 4.0, 15.0 Hz, Ha-12), 2.38 (2H, m, H-16, 34), 2.70 (1H, dd, *J* = 11.0, 15.0 Hz, Hb-12), 3.15-3.20 (2H, m, Ha-14, 22), 3.23 (2H, m, H-19), 3.44 (1H, dd, *J* = 4.0, 14.0 Hz, Hb-14), 3.52 (1H, m, H-31), 3.73 (1H, m, H-15), 3.81 (1H, m, H-6), 4.11 (1H, m, H-4), 4.14 (1H, m, H-39), 4.27 (1H, ddd, *J* = 4.0, 6.5, 8.5 Hz, H-11), 5.13 (1H, d, *J* = 9.0 Hz, H-36), 5.45 (1H, ddd, *J* = 1.5, 7.0, 15.5 Hz, H-3), 5.64 (1H, dd, *J* = 7.0, 15.5 Hz, H-2).

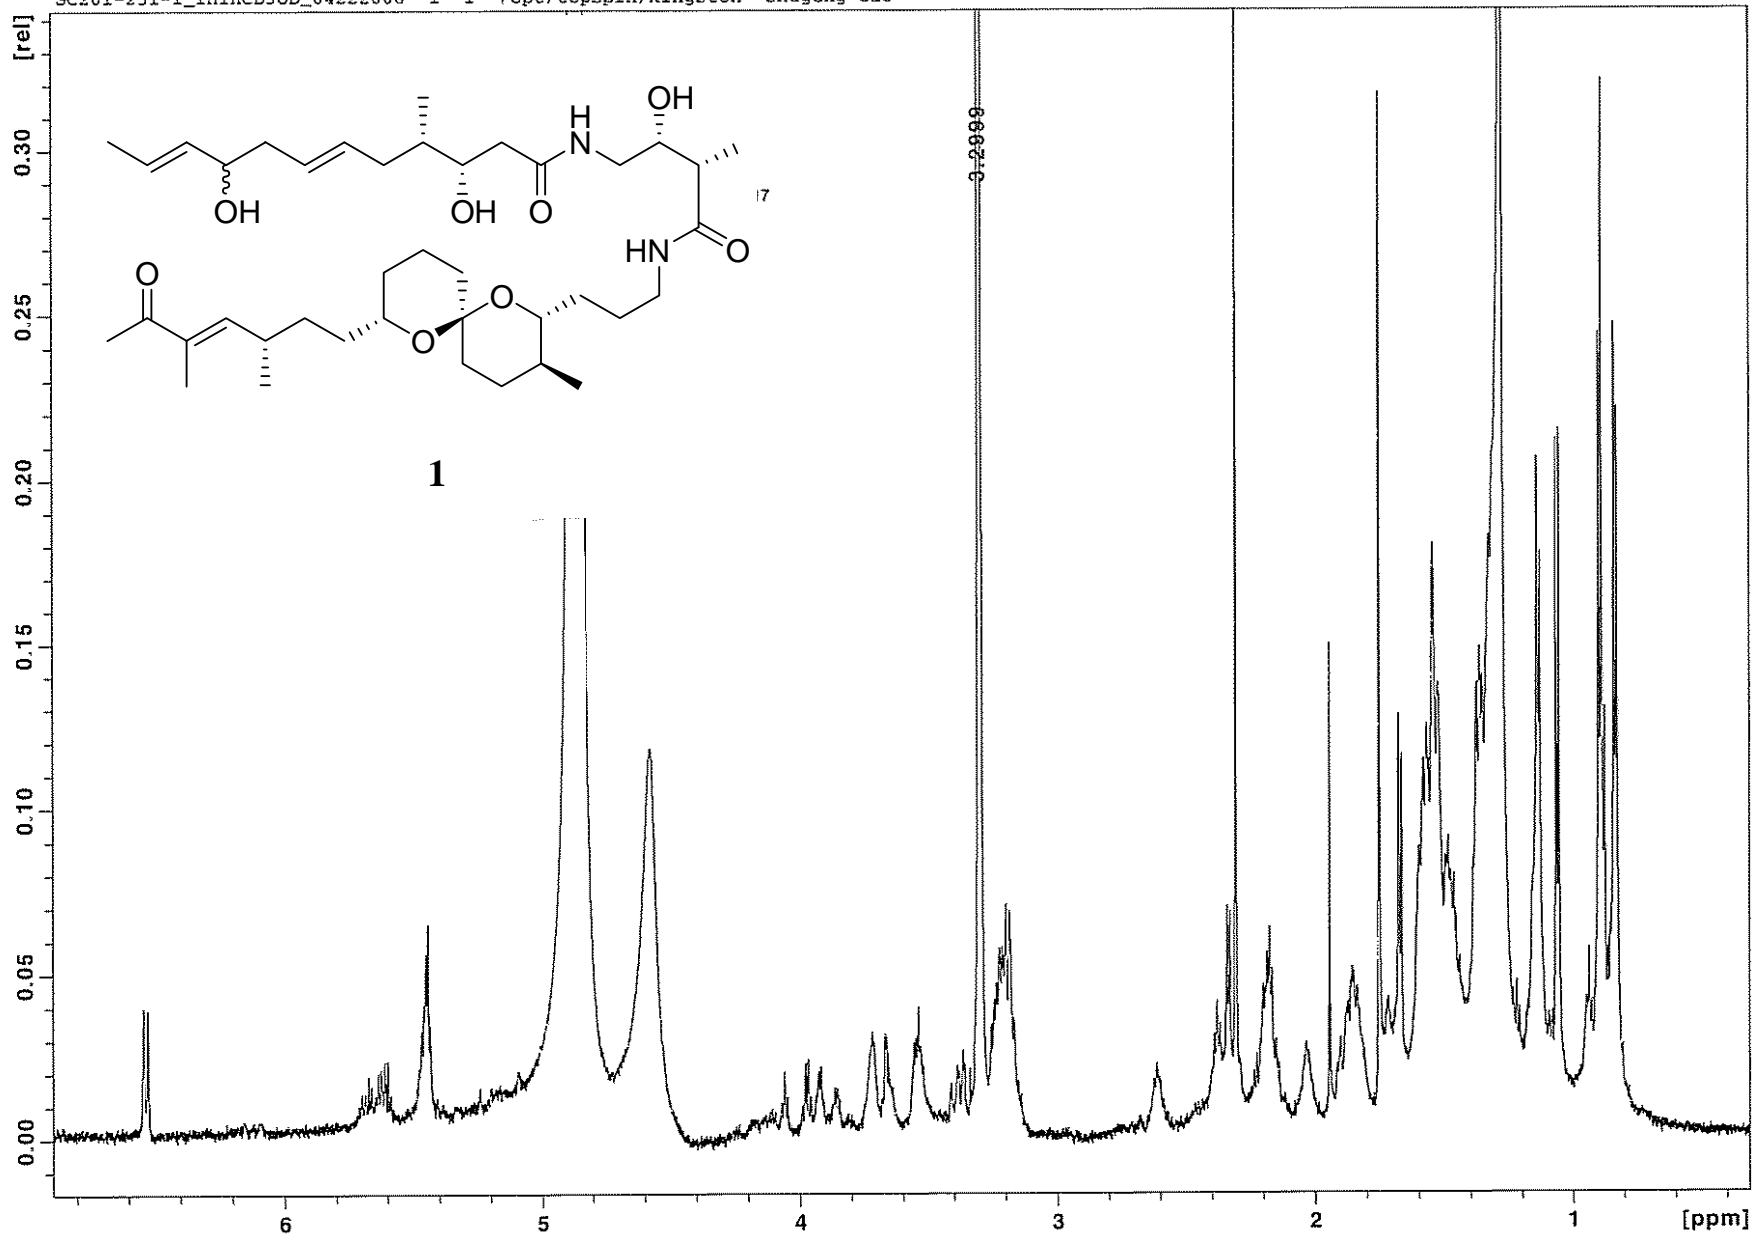

<sup>1</sup>H NMR Spectrum of 39-Oxobistramide K (1) in CD<sub>3</sub>OD

SC201-251-1\_ROESY\_04252008 1 1 "/opt/topspin/kingston/shugeng cao" shugeng cao

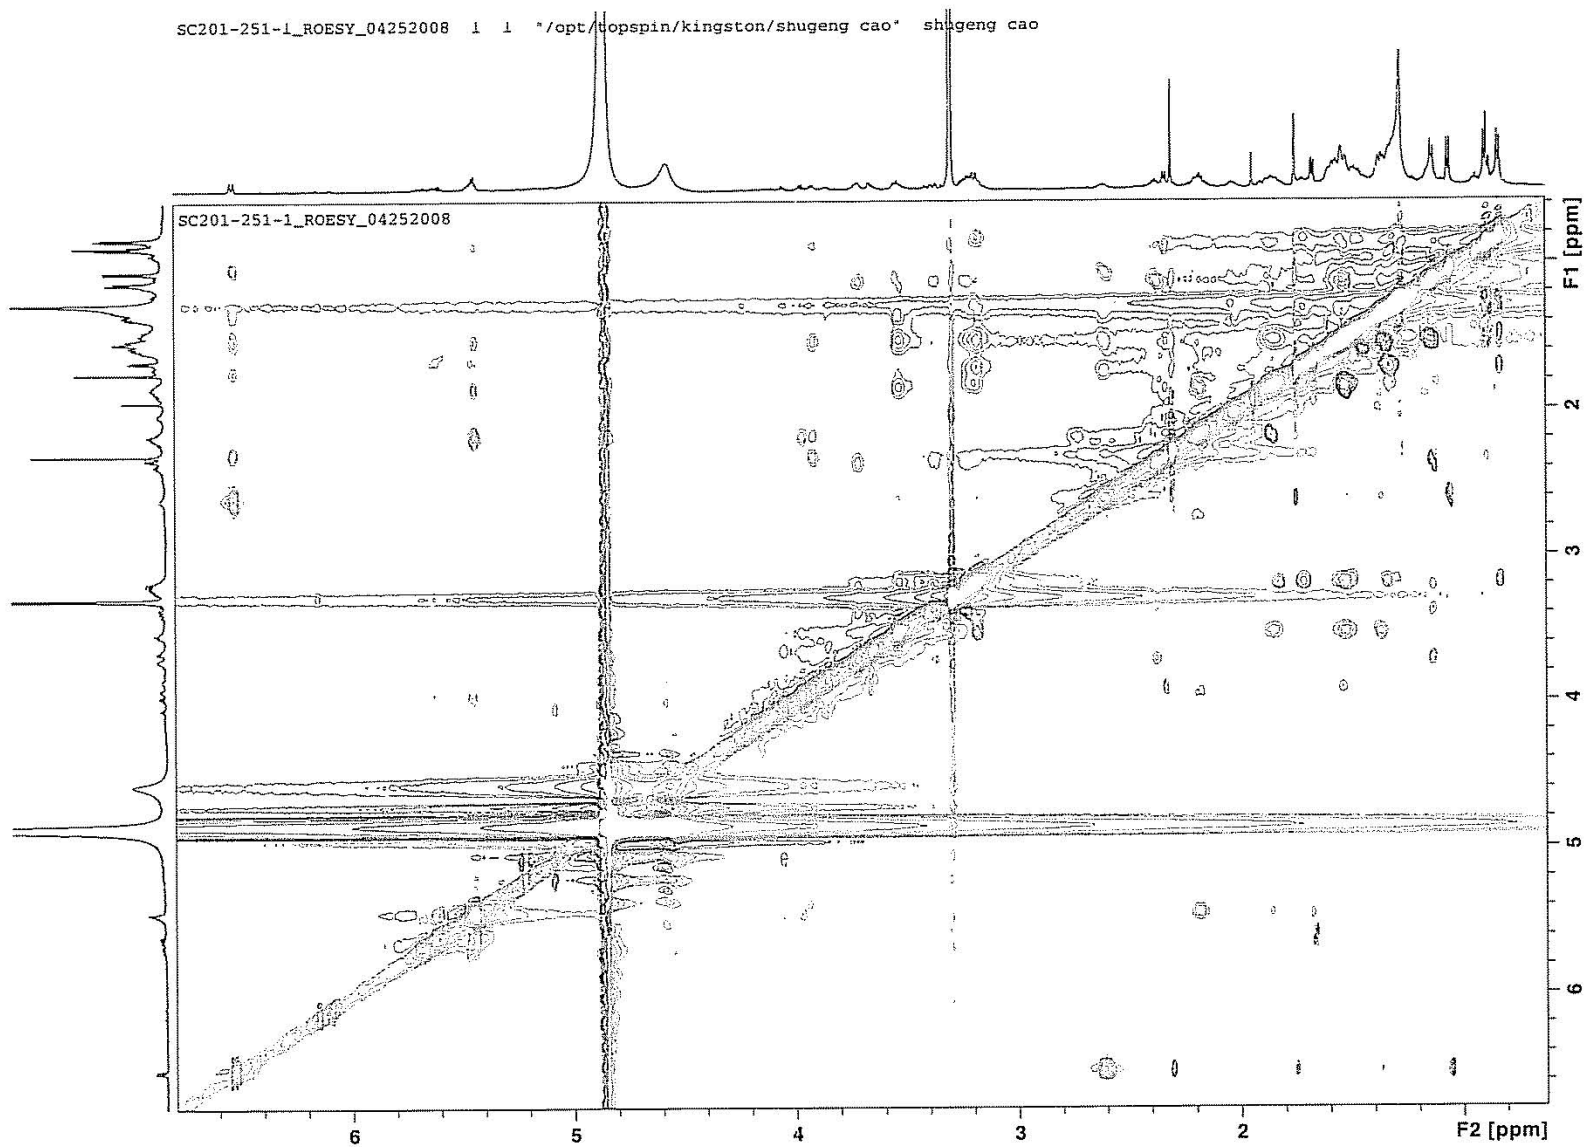

ROESY Spectrum of 39-Oxobistramide K (**1**) in CD<sub>3</sub>OD

SC201-251-3\_COSYinCD3OD\_04292008 1 1 /opt/.../kingston shugeng cao

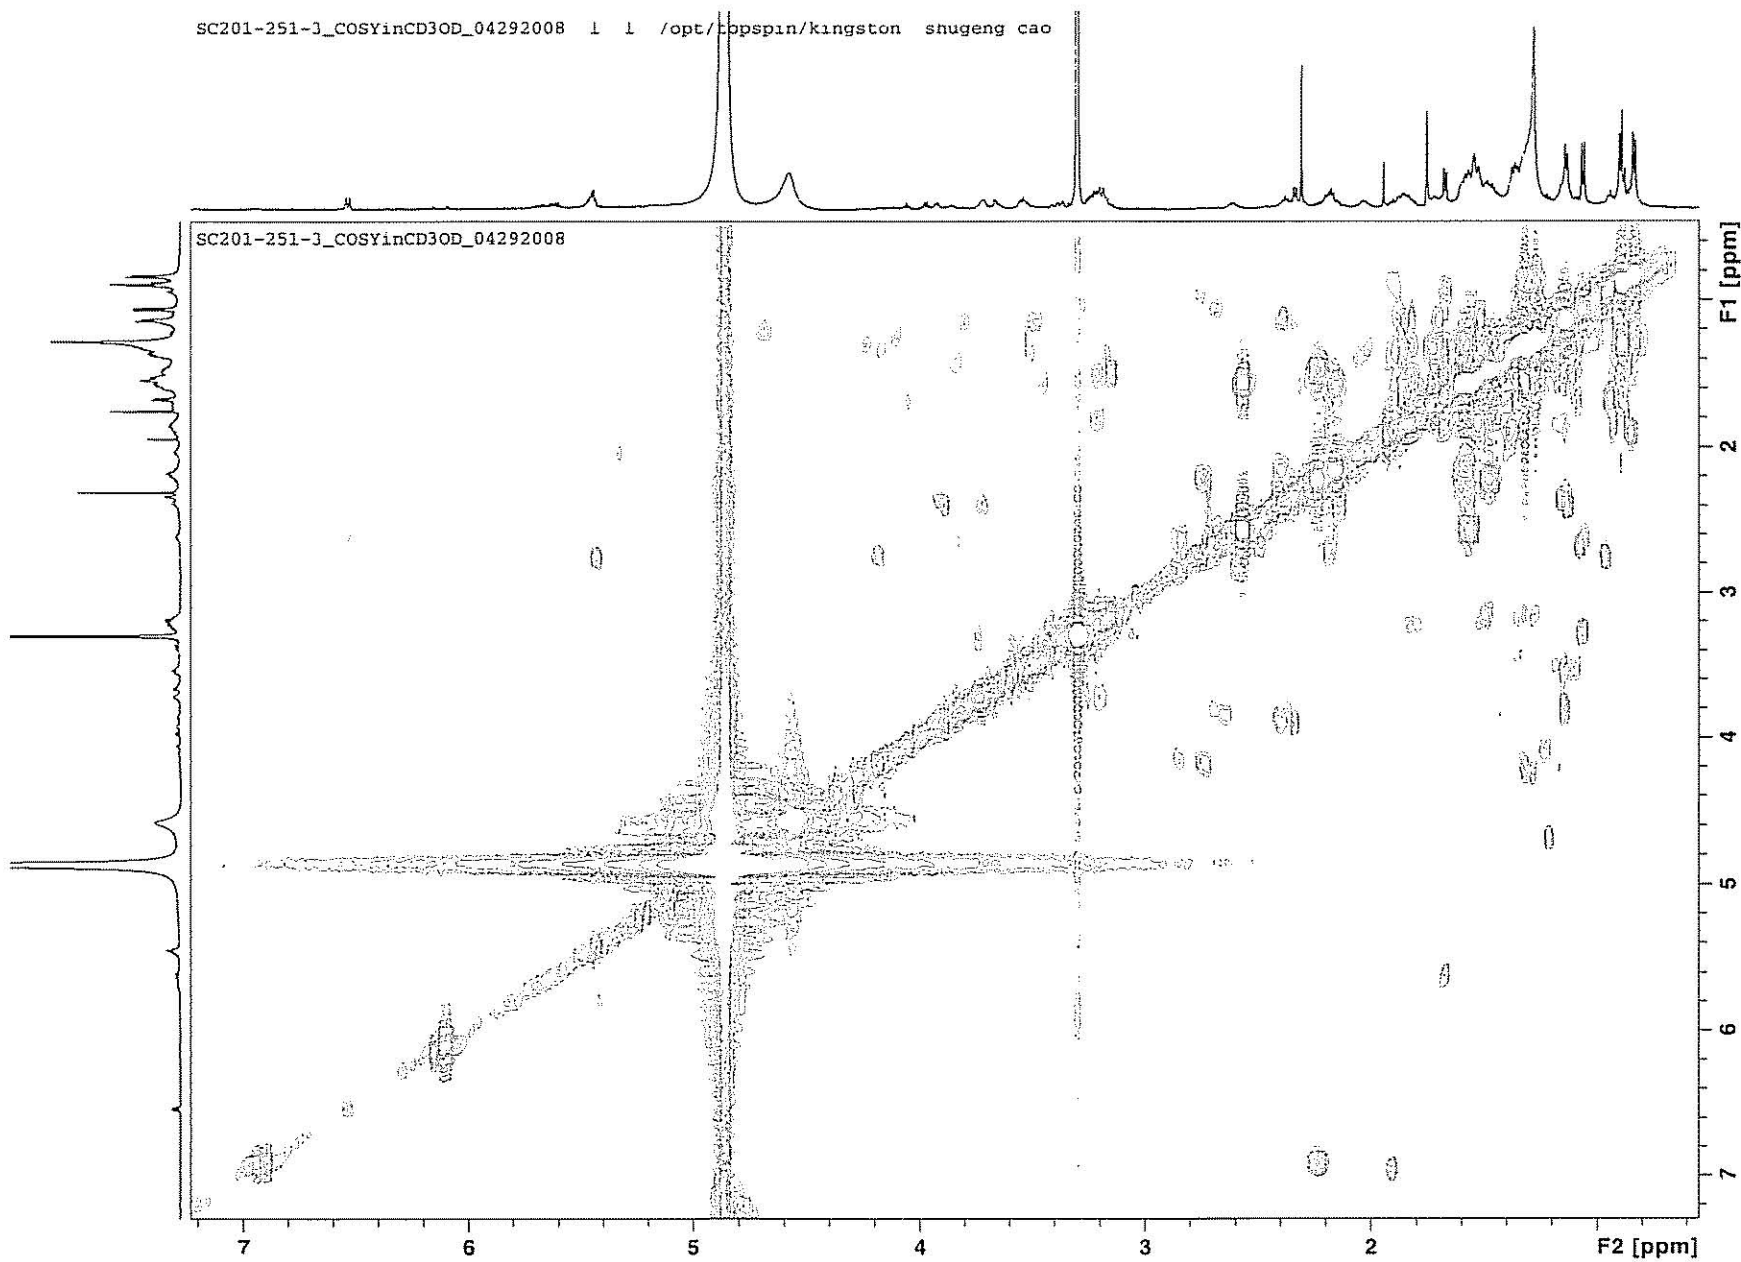

COSY Spectrum of 39-Oxobistramide K (1) in CD<sub>3</sub>OD

SC201-251-1\_HSQCinCD3OD\_04222008 1 1 /opt/topspin/kingston shugeng cao

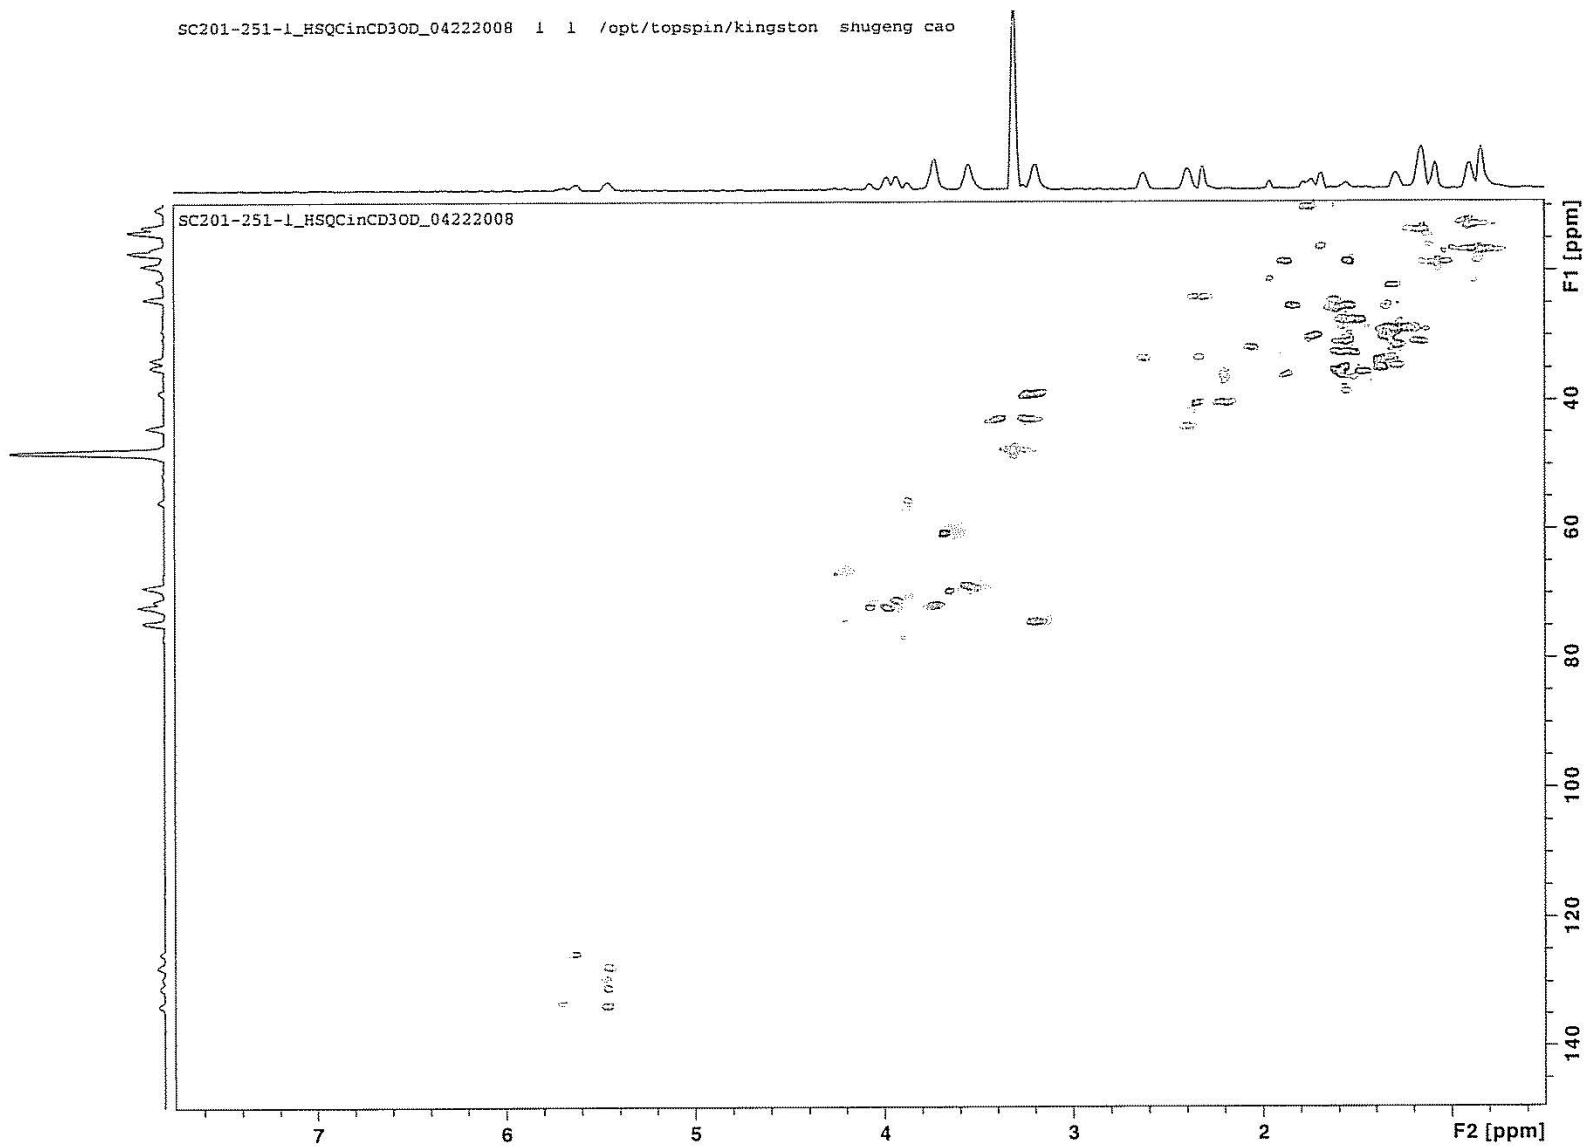

HSQC Spectrum of 39-Oxobistramide K (**1**) in CD<sub>3</sub>OD

SC201-251-1\_HMBCinCD3OD\_04232008 1 1 /opt/topspin/kingston shugeng cao

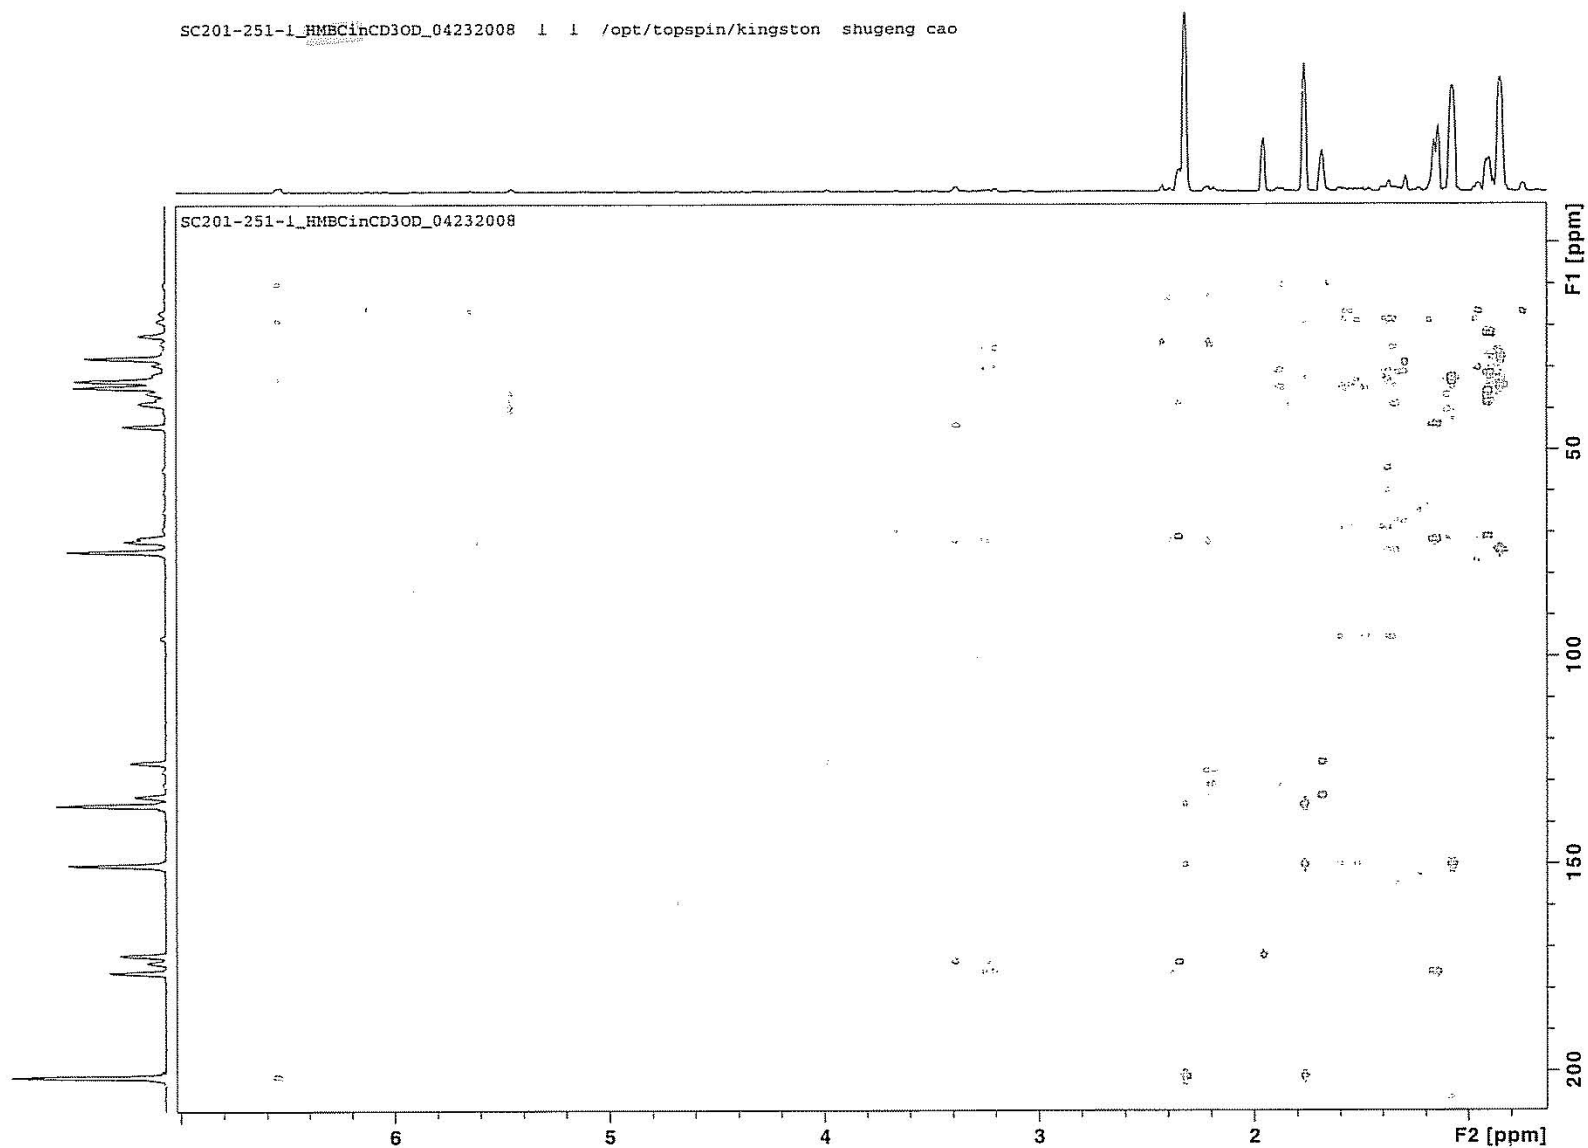

HMBC Spectrum of 39-Oxobistramide K (**1**) in CD<sub>3</sub>OD

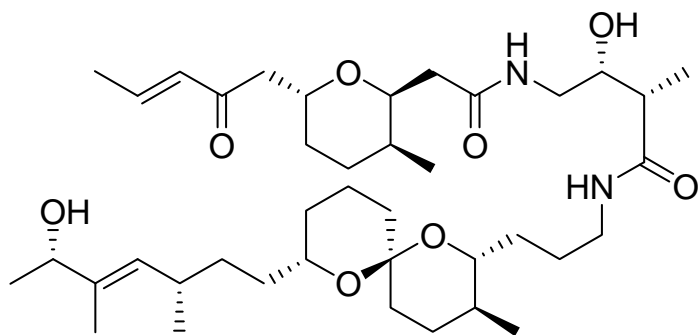

**2** Bistramide A

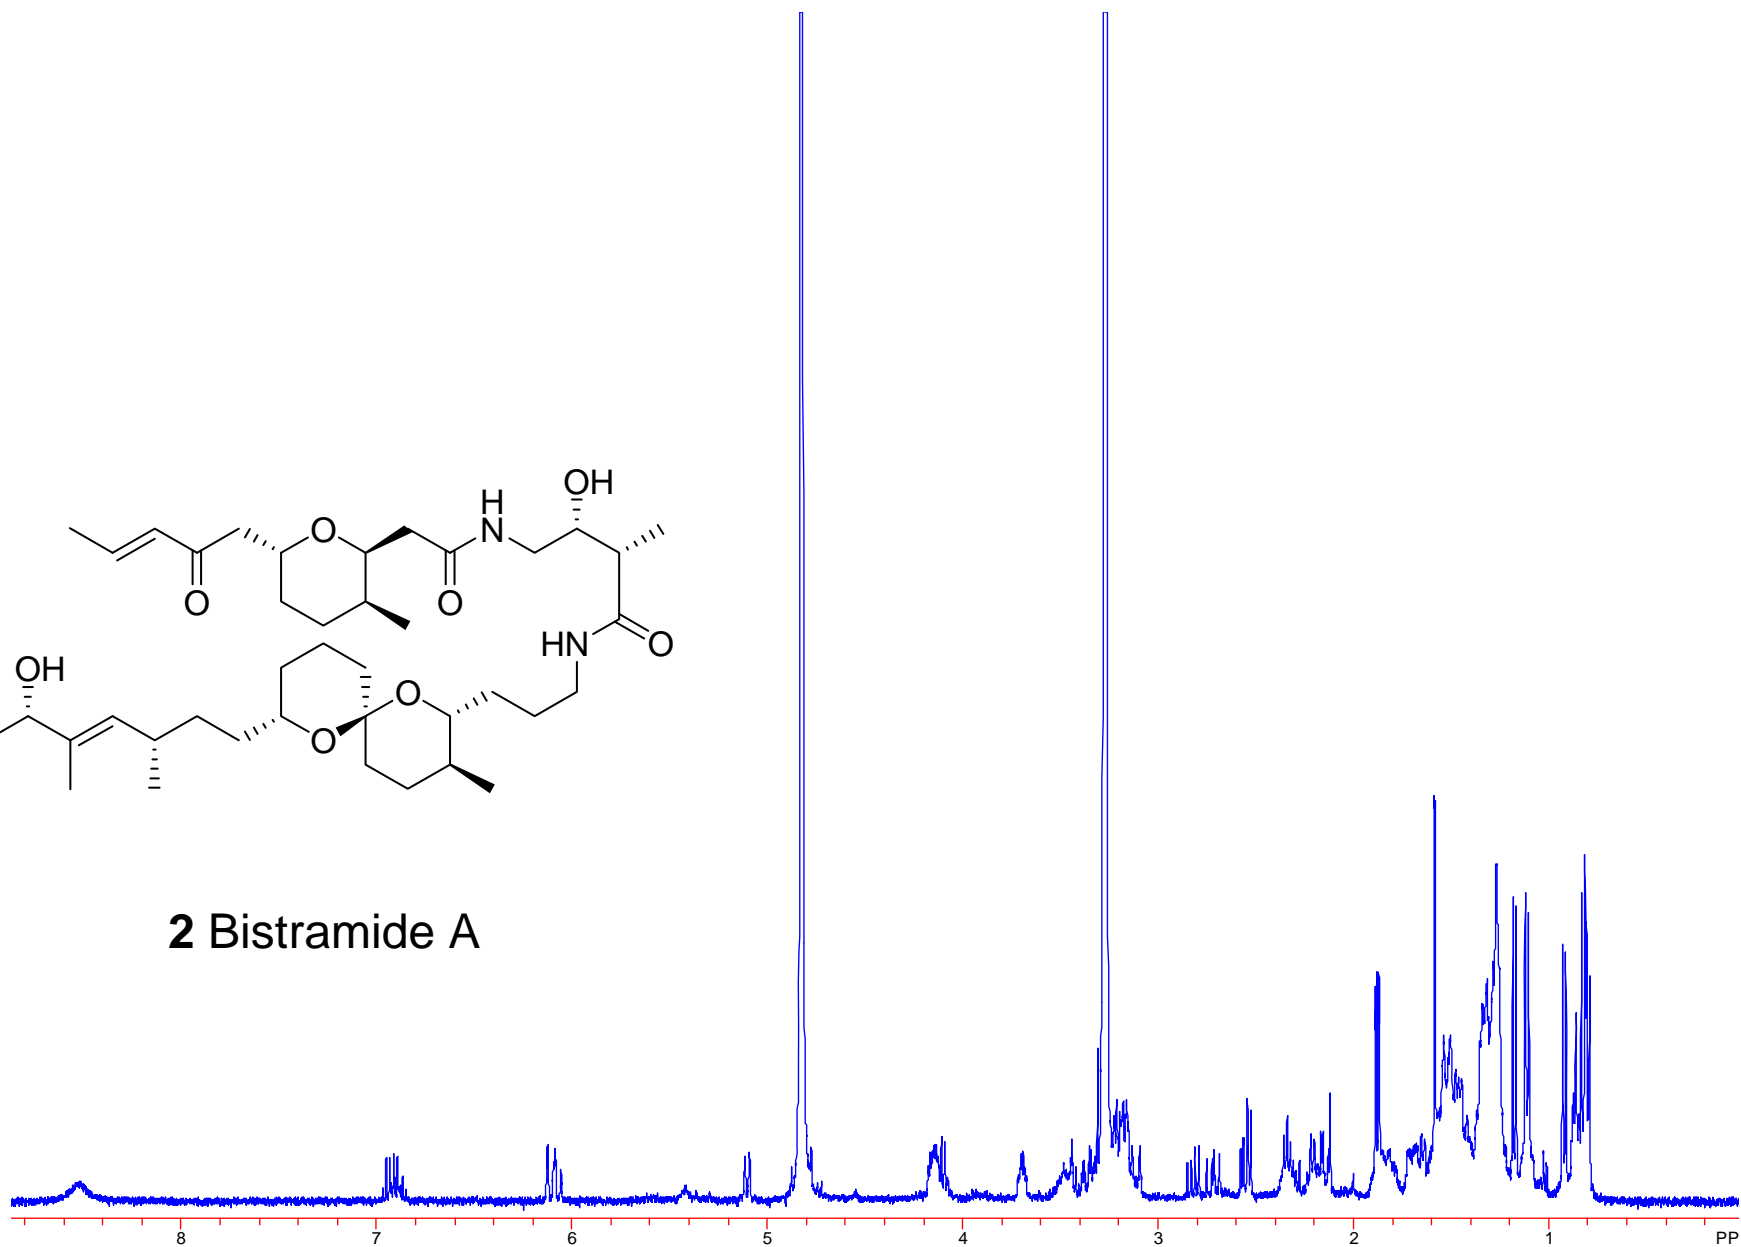

**<sup>1</sup>H NMR Spectrum of Bistramide A (2) in CD<sub>3</sub>OD**



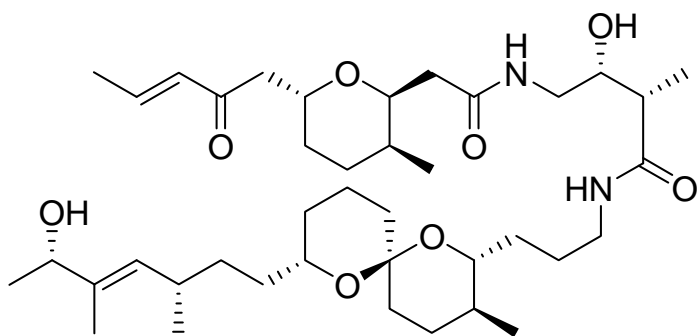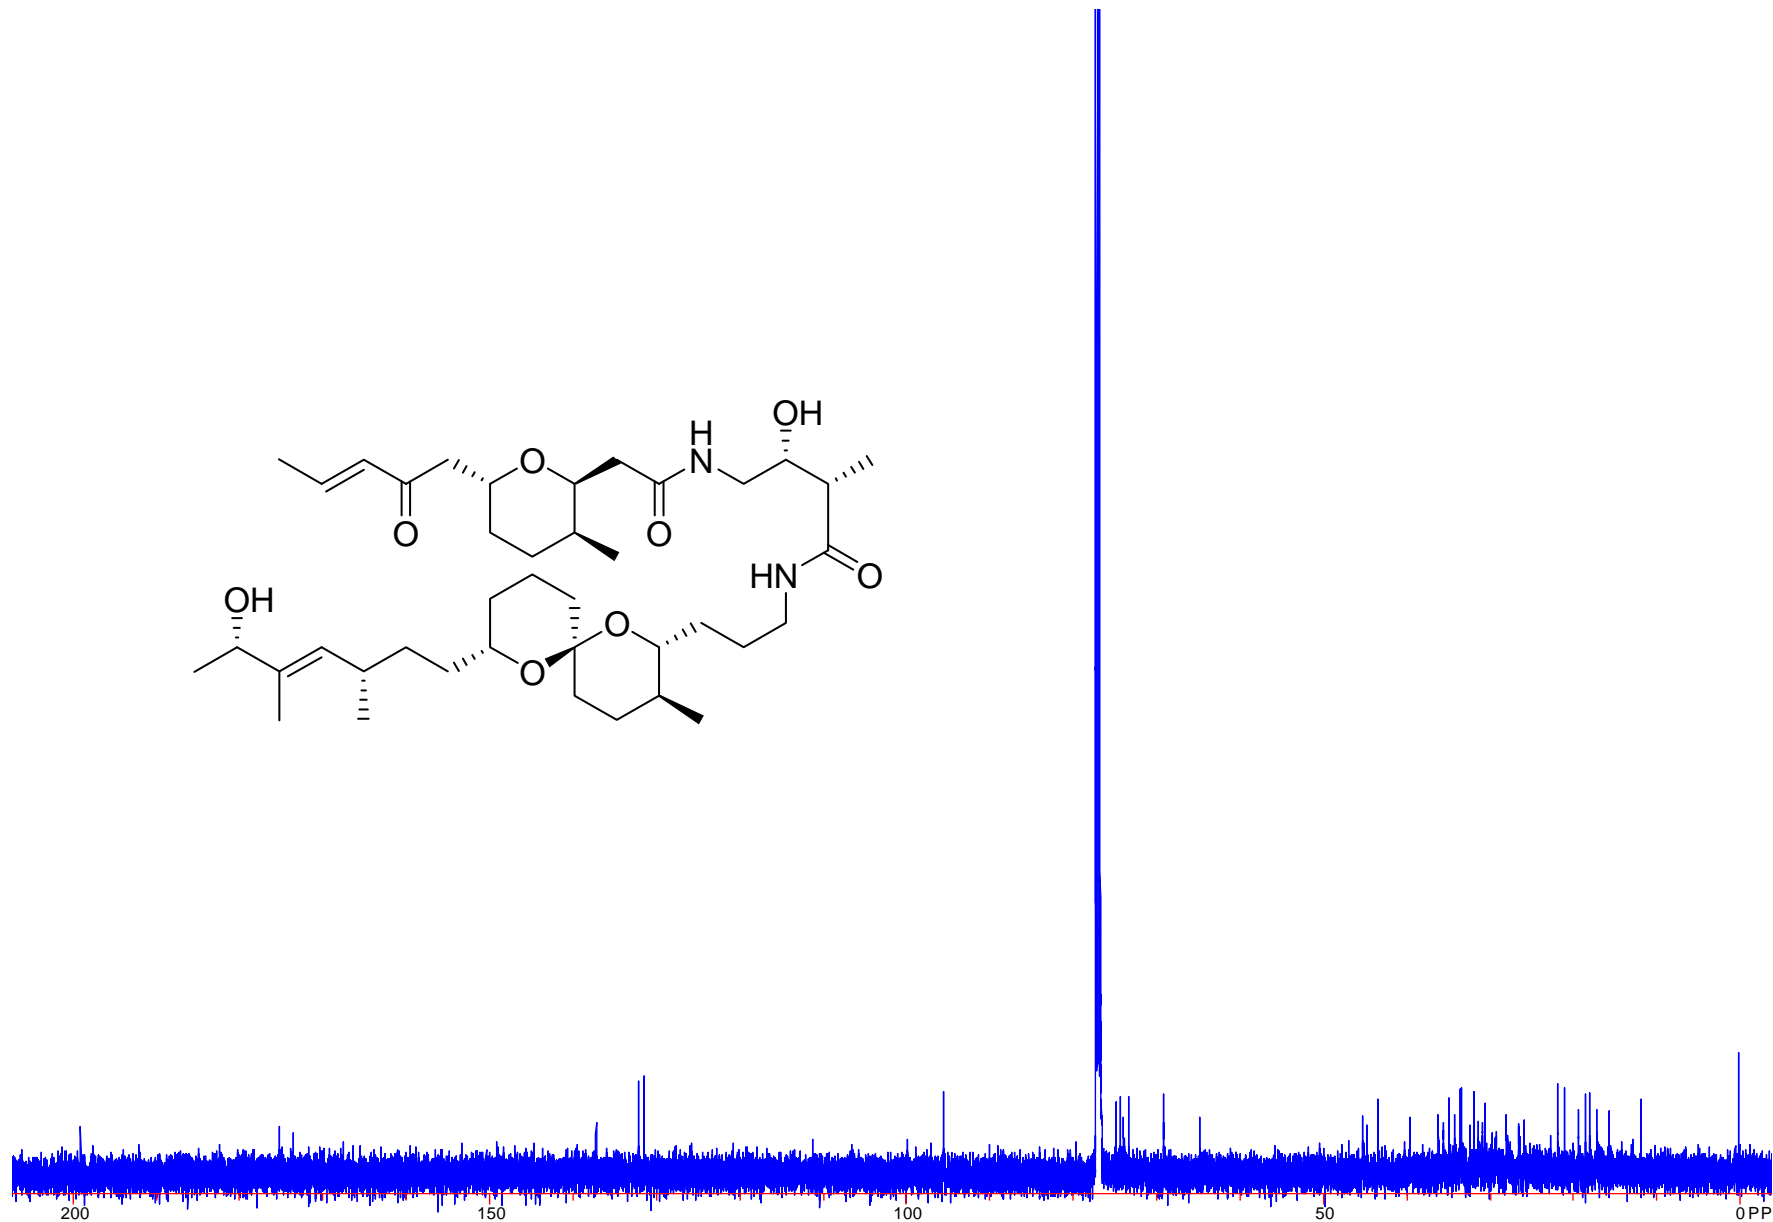

$^{13}\text{C}$  NMR Spectrum of Bistramide A (**2**) in  $\text{CDCl}_3$

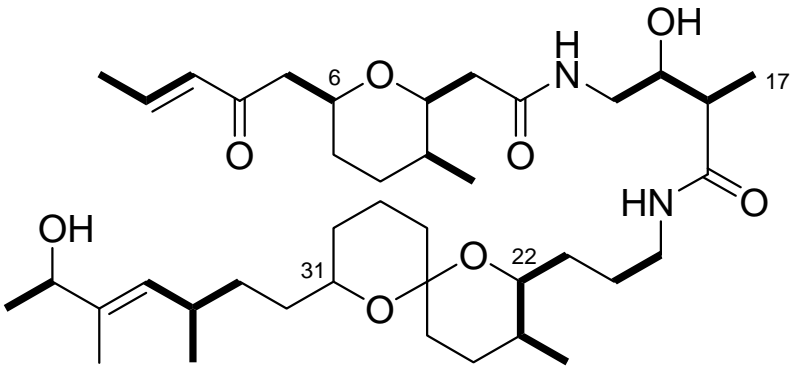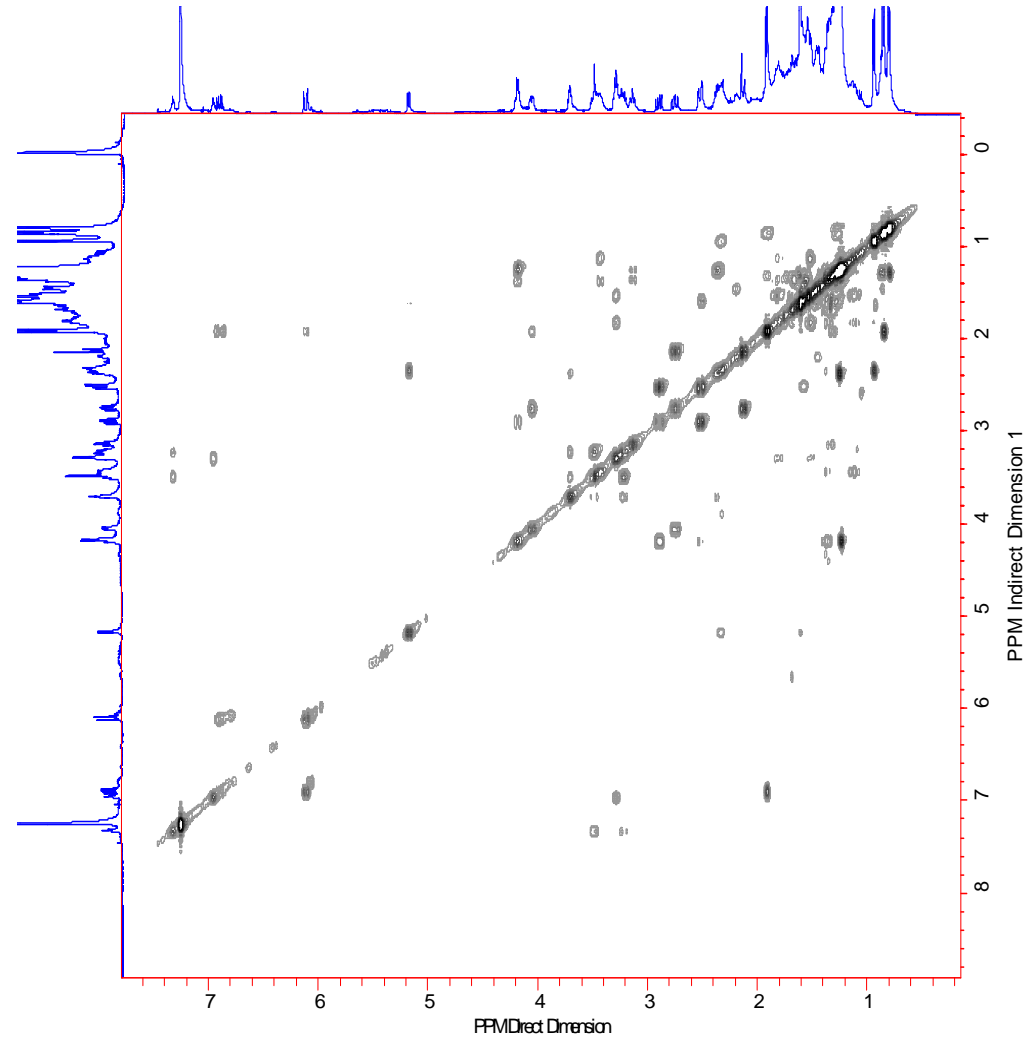

COSY Spectrum of Bistramide A (2) in CDCl<sub>3</sub>

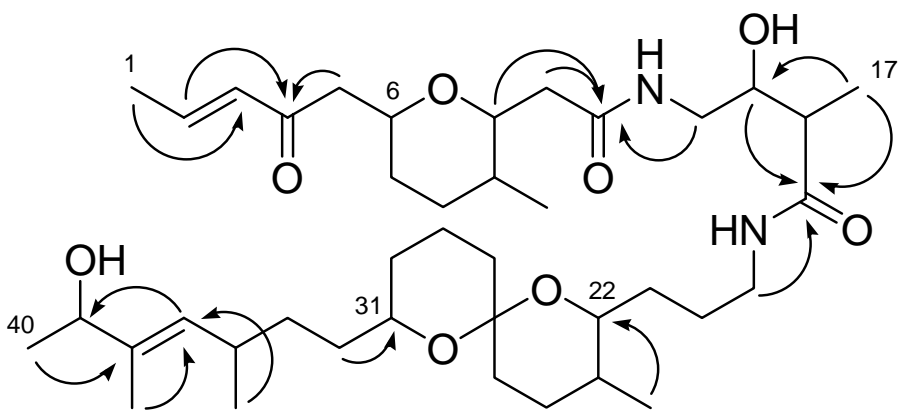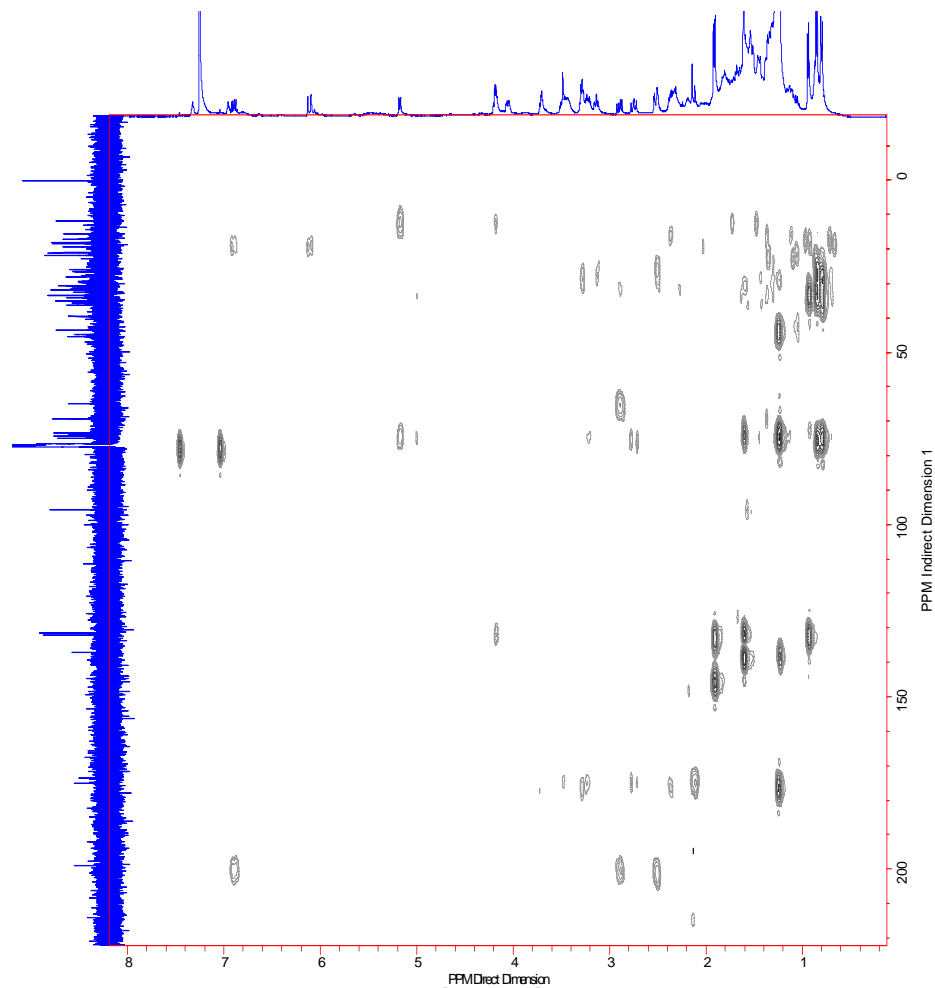

HMBC Spectrum of Bistramide A (**2**) in CDCl<sub>3</sub>

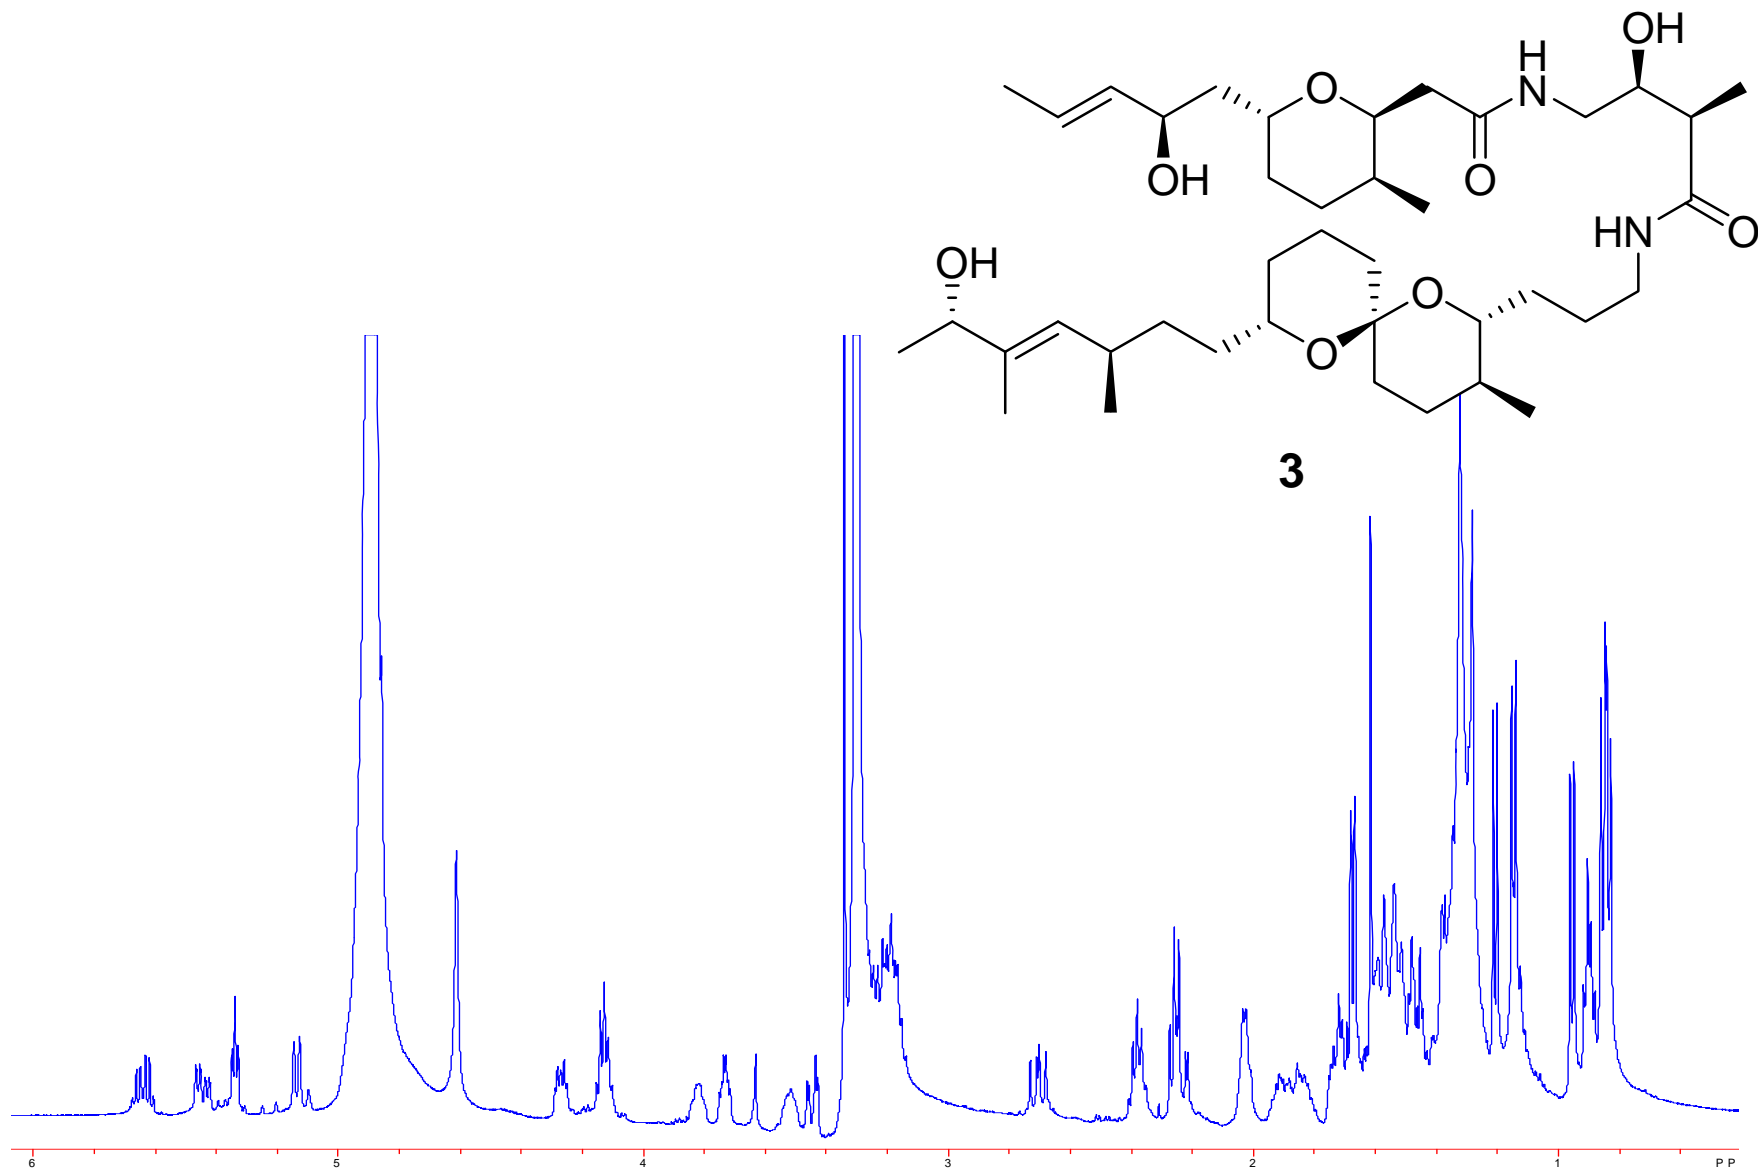

$^1\text{H}$  NMR Spectrum of Bistramide D (3) in  $\text{CD}_3\text{OD}$

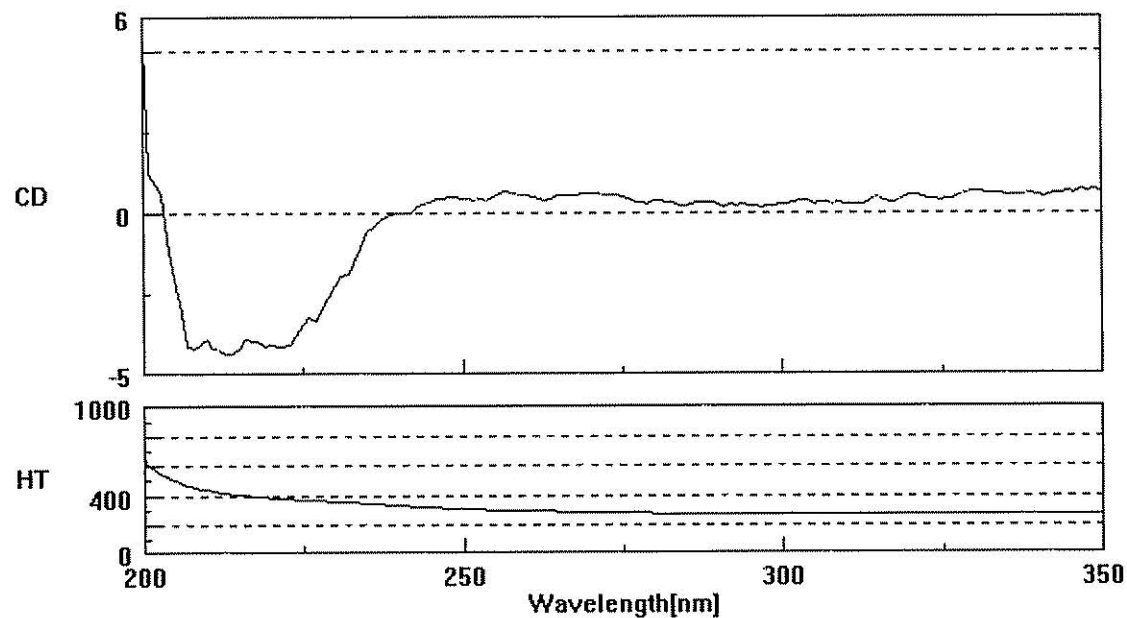

File Name : noname01.jws  
 Date : 12/12/108 1:49PM  
 Sample :SC-201-251-1  
 Cell Length : 0.2 cm  
 Concentration : 0 M  
 Solvent :CH3OH  
 Temperature : Room Temp.  
 Operator : KH  
 Organization : VI  
 Comment :

Data mode : CD  
 Ch2-mode : HT  
 Range : 400 - 200 nm  
 Band width : 1.0 nm  
 Sensitivity : 10 mdeg  
 Resolution : 1 nm  
 Response : 1 sec  
 Speed : 200 nm/min  
 Accumulation : 2

CD Spectrum of 39-Oxobistramide K (1) in CH<sub>3</sub>OH

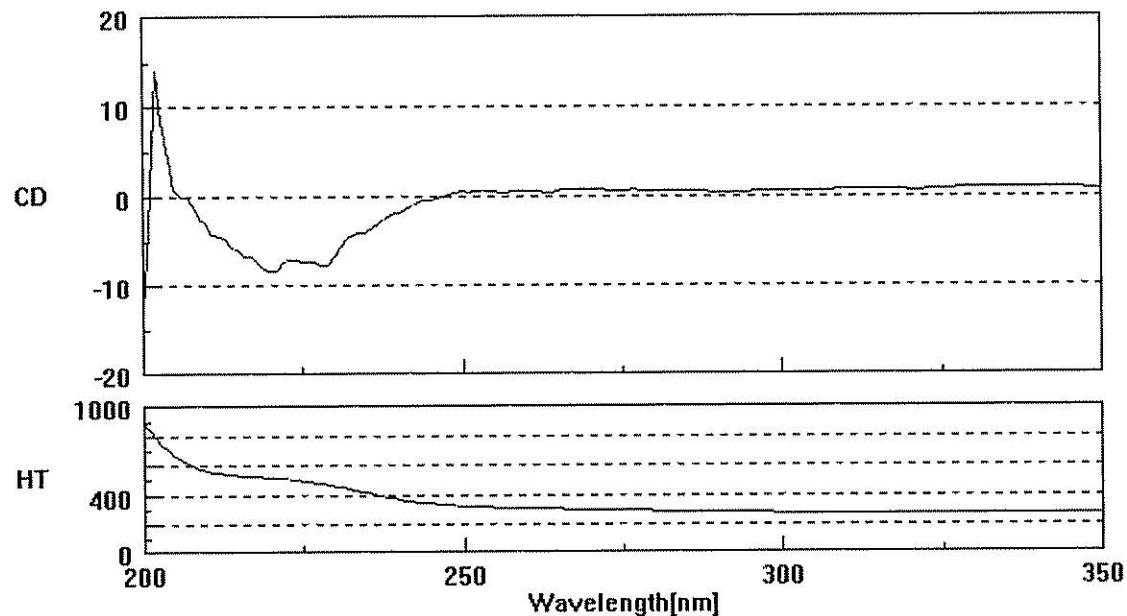

File Name : noname02.jws  
 Date : 12/12/108 1:51PM  
 Sample :BTM-193-143-146-27  
 Cell Length : 0.1 cm  
 Concentration : 0 M  
 Solvent :CH3OH  
 Temperature : Room Temp.  
 Operator : KH  
 Organization : VT  
 Comment :

Data mode : CD  
 Ch2-mode : HT  
 Range : 400 - 200 nm  
 Band width : 1.0 nm  
 Sensitivity : 10 mdeg  
 Resolution : 1 nm  
 Response : 1 sec  
 Speed : 200 nm/min  
 Accumulation : 2

CD Spectrum of Bistramide A (**2**) in CH<sub>3</sub>OH

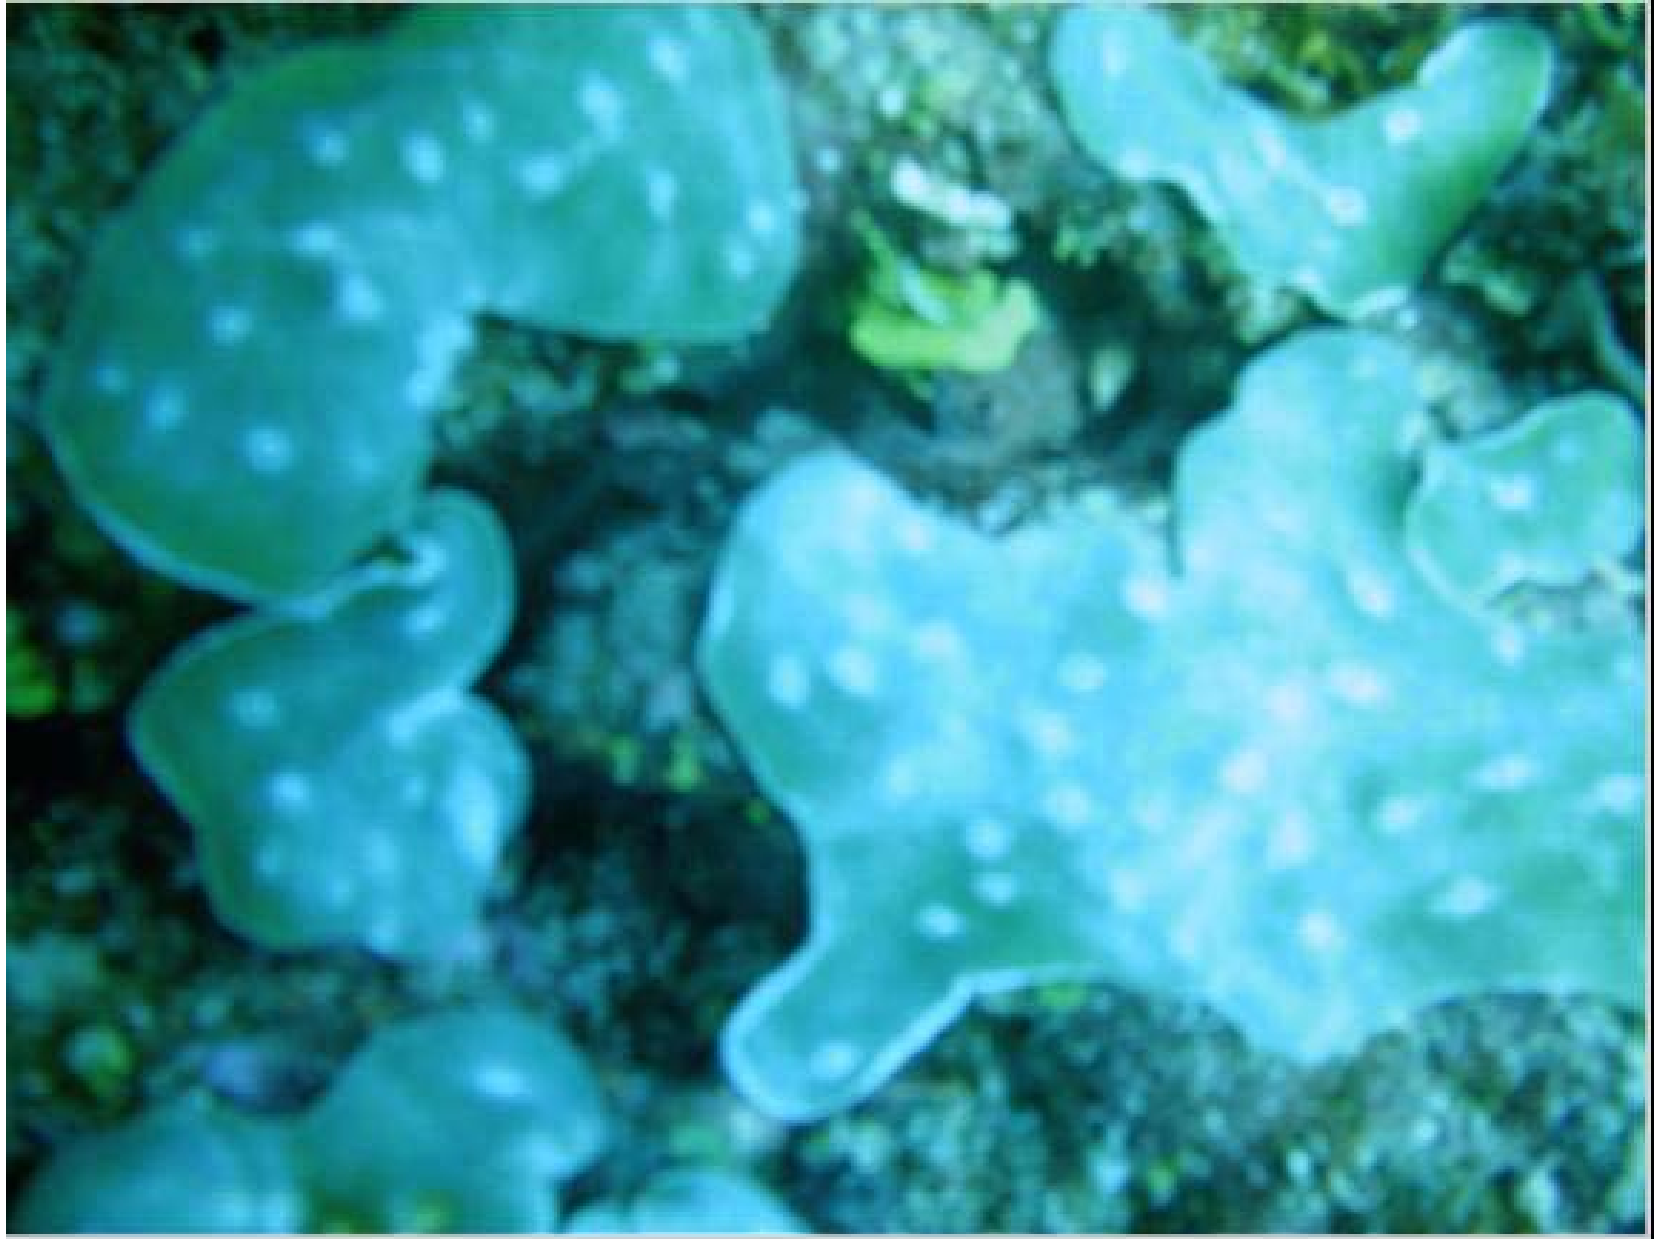

NB 04-05-31 (*Trididemnum cyclops*)
